# Supplementary material for: Computational Modelling of Metabolic Burden and Substrate Toxicity in Escherichia coli Carrying a Synthetic Metabolic Pathway
Source: Microorganisms. 2019 Nov 11;7(11):553. doi: 10.3390/microorganisms7110553 (PMC6921056; doi:10.3390/microorganisms7110553)
Supplement: Supplementary file 1 [file microorganisms-07-00553-s001.zip]

Archive with 4 entries (4 files):
- Data_S1.xlsx
- Data_S2.xlsx
- Data_S3.xlsx
- microorganisms-618432-SI.pdf
