# Supplementary material for: Computational Modelling of Metabolic Burden and Substrate Toxicity in Escherichia coli Carrying a Synthetic Metabolic Pathway
Source: Microorganisms. 2019 Nov 11;7(11):553. doi: 10.3390/microorganisms7110553 (PMC6921056; doi:10.3390/microorganisms7110553)
Supplement: Supplementary file 1 [file microorganisms-07-00553-s001.zip › Data_S1.xlsx]

## Sheet: BL21 (DE3)
time	0a	0b	0c	0.01a	0.01b	0.01c	0.05a	0.05b	0.05c	0.2a	0.2b	0.2c	1a	1b	1c
0	0.1	0.1	0.1	0.1	0.1	0.1	0.1	0.1	0.1	0.1	0.1	0.1	0.1	0.1	0.1
1	0.136634	0.102703	0.125664	0.104386	0.1375	0.103	0.114286	0.110484	0.11068	0.141176	0.101587	0.100862	0.0889831	0.10687	0.0830882
2	0.125743	0.121622	0.115929	0.114912	0.1375	0.119	0.115238	0.116935	0.133981	0.139216	0.130952	0.139655	0.114407	0.112977	0.0926471
3	0.193069	0.192793	0.188496	0.164912	0.196154	0.176	0.2	0.16371	0.191262	0.162745	0.142063	0.144828	0.14661	0.132824	0.130882
4	0.276238	0.268468	0.278761	0.230702	0.264423	0.262	0.245714	0.220161	0.239806	0.188235	0.169841	0.212931	0.149153	0.138931	0.136765
5	0.424752	0.398198	0.358407	0.35	0.395192	0.399	0.295238	0.231452	0.291262	0.247059	0.179365	0.207759	0.161864	0.166412	0.166912
6	0.685149	0.592793	0.536283	0.545614	0.632692	0.568	0.306667	0.279032	0.342718	0.231373	0.220635	0.199138	0.184746	0.153435	0.145588
7	1.05941	0.995495	0.853982	0.653509	0.903846	0.82	0.355238	0.28629	0.373786	0.229412	0.179365	0.222414	0.155932	0.146565	0.147794
8	1.06931	0.954955	0.90708	0.815789	0.899038	0.955	0.359048	0.326613	0.395146	0.22451	0.179365	0.196552	0.179661	0.167939	0.152206
9	1.02475	0.891892	0.862832	0.894737	0.884615	0.925	0.34381	0.309677	0.367961	0.240196	0.199206	0.213793	0.177966	0.164122	0.172794
10							0.386667	0.337097	0.474757	0.22549	0.202381	0.20431	0.165254	0.154962	0.163235
11							0.39619	0.345968	0.514563
	0 mM			0.1 mM			0.05 mM			0.2 mM			1 mM
time	mean	std	std %	mean	std	std %	mean	std	std %	mean	std	std %	mean	std	std %
0	0.1	1.69967e-17	1.69967e-14	0.1	1.69967e-17	1.69967e-14	0.1	1.69967e-17	1.69967e-14	0.1	1.69967e-17	1.69967e-14	0.1	1.69967e-17	1.69967e-14
1	0.121667	0.017315	14.2315	0.114962	0.0195308	16.9889	0.111816	0.00214073	1.9145	0.114542	0.023069	20.1402	0.0929805	0.0123847	13.3197
2	0.121098	0.00492761	4.06912	0.123804	0.0120358	9.72166	0.122051	0.0103658	8.49297	0.136608	0.00490262	3.58883	0.106677	0.0121713	11.4095
3	0.191453	0.00256455	1.33952	0.179022	0.0158385	8.84724	0.184991	0.0189406	10.2387	0.149879	0.011228	7.49138	0.136772	0.00857499	6.26954
4	0.274489	0.00536447	1.95435	0.252375	0.0188086	7.45264	0.235227	0.0133777	5.68713	0.190336	0.0216215	11.3597	0.141616	0.00661597	4.67176
5	0.393786	0.0333921	8.47975	0.381397	0.0272575	7.14676	0.272651	0.0357347	13.1064	0.211394	0.033993	16.0804	0.165063	0.00278112	1.68489
6	0.604741	0.0751485	12.4266	0.582102	0.0452196	7.76832	0.309472	0.0319357	10.3194	0.217048	0.0164139	7.5623	0.161256	0.0207173	12.8474
7	0.969628	0.105126	10.8419	0.792452	0.127422	16.0795	0.338438	0.0461039	13.6225	0.210397	0.0271012	12.881	0.150097	0.00509061	3.39155
8	0.977114	0.0833528	8.53051	0.889943	0.0700496	7.87125	0.360269	0.0342827	9.51586	0.200142	0.0227855	11.3847	0.166602	0.0137763	8.269
9	0.926492	0.0863276	10.7323	0.901451	0.0210128	2.331	0.340483	0.0292839	11.6269	0.217732	0.0207768	9.54237	0.171627	0.00699533	4.07588
10							0.399507	0.0697227	17.4522	0.210727	0.0128215	6.08441	0.16115	0.00545374	3.38426
11							0.418907	0.0865629	20.664

## Sheet: deg31
time	0a	0b	0c	0.01a	0.01b	0.01c	0.05a	0.05b	0.05c	0.2a	0.2b	0.2c	1a	1b	1c
0	0.1	0.1	0.1	0.1	0.1	0.1	0.1	0.1	0.1	0.1	0.1	0.1	0.1	0.1	0.1
1	0.0989899	0.105825	0.122	0.0921569	0.0959596	0.12	0.112632	0.105	0.098913	0.129412	0.10495	0.1	0.114151	0.130612	0.109091
2	0.126263	0.11165	0.129	0.111765	0.138384	0.12	0.115789	0.12	0.153261	0.106863	0.109901	0.110092	0.116981	0.12551	0.127273
3	0.170707	0.187379	0.175	0.170588	0.187879	0.18	0.157895	0.178	0.16413	0.115686	0.135644	0.122018	0.14434	0.144898	0.134343
4	0.253535	0.252427	0.246	0.22549	0.245455	0.232632	0.168421	0.164	0.201087	0.148039	0.138614	0.136697	0.129245	0.132653	0.153535
5	0.378788	0.38932	0.355	0.328431	0.326263	0.377895	0.174737	0.2	0.202174	0.145098	0.167327	0.142202	0.124528	0.138776	0.153535
6	0.539394	0.596117	0.558	0.507843	0.484848	0.515789	0.187368	0.2	0.205435	0.173529	0.175248	0.155963	0.15	0.171429	0.162626
7	0.686869	0.762136	0.66	0.710784	0.530303	0.657895	0.225263	0.236	0.269565	0.160784	0.193069	0.16789	0.142453	0.172449	0.173737
8	0.858586	0.927184	0.84	0.960784	0.747475	0.878947	0.229474	0.234	0.238043	0.168627	0.19802	0.165138	0.158491	0.184694	0.174747
9	0.909091	0.830097	0.945	0.955882	0.994949	0.989474	0.224211	0.243	0.233696	0.202941	0.174257	0.16422	0.174528	0.186735	0.174747
10	0.90404	0.815534	0.935	0.97549	0.964646	0.978947	0.229474	0.249	0.232609	0.179412	0.19703	0.174312	0.183019	0.196939	0.163636
11
	0 mM			0.1 mM			0.05 mM			0.2 mM			1 mM
time	mean	std	std %	mean	std	std %	mean	std	std %	mean	std	std %	mean	std	std %
0	0.1	1.69967e-17	1.69967e-14	0.1	1.69967e-17	1.69967e-14	0.1	1.69967e-17	1.69967e-14	0.1	1.69967e-17	1.69967e-14	0.1	1.69967e-17	1.69967e-14
1	0.108938	0.0118167	10.8472	0.102705	0.0150977	14.7	0.105515	0.00687375	6.51448	0.111454	0.0157476	14.1292	0.117951	0.0112527	9.54016
2	0.122304	0.0093275	7.62646	0.123383	0.0136282	11.0454	0.129683	0.0205269	15.8285	0.108952	0.00181171	1.66285	0.123255	0.00550407	4.4656
3	0.177695	0.00865642	4.8715	0.179489	0.0086566	4.82291	0.166675	0.0102913	6.17449	0.124449	0.0101983	8.19476	0.141194	0.00593904	4.20631
4	0.250654	0.00406854	1.62317	0.234525	0.010116	4.3134	0.177836	0.0202569	11.3908	0.141117	0.00607112	4.3022	0.138478	0.013151	9.49681
5	0.374369	0.0175816	4.69634	0.344196	0.0292039	8.48466	0.192304	0.015252	7.93122	0.151542	0.0137463	9.07093	0.138946	0.0145043	10.4388
6	0.564503	0.0289151	5.12222	0.502827	0.0160688	3.1957	0.197601	0.00926901	4.69077	0.168247	0.0106724	6.34331	0.161352	0.010771	6.67548
7	0.703002	0.0529447	7.53123	0.632994	0.0927815	14.6576	0.243609	0.0231105	9.48671	0.173915	0.0169647	9.75464	0.16288	0.0177019	10.8681
8	0.875257	0.0459208	5.24655	0.862402	0.107613	12.4783	0.233839	0.00428716	1.83338	0.177262	0.0180616	10.1892	0.172644	0.0132277	7.66183
9	0.894729	0.0587823	6.56984	0.980102	0.0211526	2.15821	0.233635	0.00939488	4.02117	0.180473	0.0200949	11.1346	0.17867	0.00698495	3.90941
10	0.884858	0.062	7.00677	0.973028	0.00746162	0.766845	0.237027	0.0104863	4.4241	0.183584	0.0119199	6.49284	0.181198	0.0167257	9.23063
11
in g/L of cells dry weight taken as 0.39 g/L = 1 OD600
	0 mM			0.1 mM			0.05 mM			0.2 mM			1 mM
time	mean	std	std %	mean	std	std %	mean	std	std %	mean	std	std %	mean	std	std %
0	0.039	6.62873e-18	1.69967e-14	0.039	6.62873e-18	1.69967e-14	0.039	6.62873e-18	1.69967e-14	0.039	6.62873e-18	1.69967e-14	0.039	6.62873e-18	1.69967e-14
1	0.042486	0.00460852	10.8472	0.0400551	0.0058881	14.7	0.0411508	0.00268076	6.51448	0.0434671	0.00614155	14.1292	0.046001	0.00438857	9.54016
2	0.0476987	0.00363772	7.62646	0.0481193	0.00531499	11.0454	0.0505765	0.00800549	15.8285	0.0424912	0.000706567	1.66285	0.0480693	0.00214659	4.4656
3	0.0693011	0.003376	4.8715	0.0700007	0.00337607	4.82291	0.0650033	0.00401362	6.17449	0.0485353	0.00397735	8.19476	0.0550655	0.00231623	4.20631
4	0.0977551	0.00158673	1.62317	0.0914649	0.00394525	4.3134	0.069356	0.00790019	11.3908	0.0550355	0.00236774	4.3022	0.0540064	0.00512888	9.49681
5	0.146004	0.00685684	4.69634	0.134237	0.0113895	8.48466	0.0749984	0.00594829	7.93122	0.0591015	0.00536105	9.07093	0.0541891	0.00565667	10.4388
6	0.220156	0.0112769	5.12222	0.196103	0.00626684	3.1957	0.0770644	0.00361491	4.69077	0.0656162	0.00416224	6.34331	0.0629271	0.00420069	6.67548
7	0.274171	0.0206484	7.53123	0.246868	0.0361848	14.6576	0.0950077	0.0090131	9.48671	0.0678267	0.00661624	9.75464	0.0635231	0.00690376	10.8681
8	0.34135	0.0179091	5.24655	0.336337	0.0419691	12.4783	0.0911972	0.00167199	1.83338	0.069132	0.00704402	10.1892	0.0673311	0.0051588	7.66183
9	0.348944	0.0229251	6.56984	0.38224	0.00824953	2.15821	0.0911178	0.003664	4.02117	0.0703844	0.00783699	11.1346	0.0696814	0.00272413	3.90941
10	0.345095	0.02418	7.00677	0.379481	0.00291003	0.766845	0.0924407	0.00408967	4.4241	0.0715979	0.00464874	6.49284	0.0706672	0.00652303	9.23063
11
