# Supplementary material for: Computational Modelling of Metabolic Burden and Substrate Toxicity in Escherichia coli Carrying a Synthetic Metabolic Pathway
Source: Microorganisms. 2019 Nov 11;7(11):553. doi: 10.3390/microorganisms7110553 (PMC6921056; doi:10.3390/microorganisms7110553)
Supplement: Supplementary file 1 [file microorganisms-07-00553-s001.zip › Data_S2.xlsx]

## Sheet: List1
	OD600
time (hrs)	mean	std	std %	μ (h-1)	g (hrs)					ODmax half			time (hrs)	glycerol (mM)	std	std%
0	0.10375	0.0045	4.33735							0.60125			0	10.12	0.137328	1.357
1	0.1105	0.00378594	3.42619	0.0630314	10.9969					0.60125			1	10.068	0.360434	3.58
2	0.13475	0.00991211	7.35593	0.198406	3.49359					0.60125			2	9.974	0.39497	3.96
3	0.1715	0.00984886	5.74277	0.241162	2.8742					0.60125			3	9.49599	0.413076	4.35
4	0.23275	0.00963933	4.14149	0.305382	2.26977					0.60125			4	8.9523	0.602132	6.726
5	0.33325	0.00853913	2.56238	0.358928	1.93116					0.60125			5	8.0862	0.601371	7.437		Y(X/S)	0.109688
6	0.538	0.0305068	5.67041	0.478966	1.44718					0.60125			6	6.12035	0.624276	10.2
7	0.817	0.0386954	4.73628	0.417781	1.65912					0.60125			7	3.55063	0.316362	8.91
8	1.115	0.0122474	1.09843	0.310971	2.22898					0.60125			8	0.959158	0.0234994	2.45
9	1.18625	0.0275	2.31823	0.0619427	11.1901					0.60125			9	0.14967	0.00413733	2.7643
10	1.2025	0.0361709	3.00797	0.0136057	50.9455					0.60125			10	0.0735	0.00260866	3.5492
				0.273272	2.57199
