# Supplementary material for: Computational Modelling of Metabolic Burden and Substrate Toxicity in Escherichia coli Carrying a Synthetic Metabolic Pathway
Source: Microorganisms. 2019 Nov 11;7(11):553. doi: 10.3390/microorganisms7110553 (PMC6921056; doi:10.3390/microorganisms7110553)
Supplement: Supplementary file 1 [file microorganisms-07-00553-s001.zip › Data_S3.xlsx]

## Sheet: List1
time	TCP1a	TCP1b	TCP2a	TCP2b	TCP4a	TCP4b	ECH1a	ECH1b	ECH2a	ECH2b	ECH4a	ECH4b	CPD4a	CPD4b	GDL4a	GDL4b	DE3a	DE3b
0	0.103	0.104	0.109	0.091	0.108	0.109	0.097	0.1	0.088	0.094	0.088	0.096	0.089	0.112	0.098	0.1	0.104	0.109		OD values
1	0.119	0.103	0.142	0.103	0.084	0.106	0.117	0.11	0.104	0.12	0.11	0.104	0.098	0.113	0.11	0.105	0.129	0.124
2	0.14	0.124	0.126	0.12	0.114	0.112	0.128	0.131	0.113	0.136	0.107	0.109	0.131	0.126	0.128	0.117	0.135	0.14
3	0.174	0.136	0.147	0.141	0.11	0.106	0.125	0.118	0.129	0.127	0.115	0.106	0.158	0.149	0.16	0.16	0.168	0.164
4	0.226	0.205	0.204	0.185	0.13	0.126	0.123	0.115	0.117	0.121	0.106	0.111	0.208	0.213	0.22	0.228	0.235	0.232
5	0.306	0.311	0.285	0.275	0.151	0.148	0.124	0.143	0.116	0.114	0.096	0.1	0.287	0.278	0.333	0.312	0.336	0.325
6	0.526	0.47	0.45	0.404	0.174	0.159	0.13	0.125	0.111	0.113	0.102	0.105	0.414	0.378	0.438	0.526	0.524	0.548
7	0.768	0.724	0.648	0.572	0.174	0.175	0.132	0.128	0.112	0.129	0.101	0.103	0.464	0.516	0.708	0.7	0.768	0.764
8	0.864	0.804	0.834	0.78	0.222	0.199	0.132	0.14	0.116	0.116	0.107	0.104	0.72	0.756	0.888	0.906	0.906	1.038
9	0.96	1.002	0.966	0.876	0.257	0.223	0.138	0.136	0.114	0.12	0.103	0.106	0.888	0.81	1.062	1.032	1.122	1.134
10	1.014	0.966	0.888	0.912	0.29	0.246	0.134	0.142	0.119	0.131	0.102	0.104	0.864	0.858	0.984	1.074	1.158	1.11
11	1.038	0.972	0.882	0.936	0.32	0.273	0.132	0.136	0.116	0.111	0.106	0.105	0.846	0.9	1.026	1.038	1.164	1.14
	TCP									ECH									CPD			GDL			BL21 (DE3)
	1 mM			2 mM			4 mM			1 mM			2 mM			4 mM			4 mM			4 mM
time	mean	std	std %	mean	std	std %	mean	std	std %	mean	std	std %	mean	std	std %	mean	std	std %	mean	std	std %	mean	std	std %	mean	std	std %
0	0.1035	0.000707107	0.683195	0.1	0.0127279	12.7279	0.1085	0.000707107	0.651711	0.0985	0.00212132	2.15362	0.091	0.00424264	4.66224	0.092	0.00565685	6.14875	0.1005	0.0162635	16.1825	0.099	0.00141421	1.4285	0.1065	0.00353553	3.31975
1	0.111	0.0113137	10.1925	0.1225	0.0275772	22.512	0.095	0.0155563	16.3751	0.1135	0.00494975	4.36101	0.112	0.0113137	10.1015	0.107	0.00424264	3.96508	0.1055	0.0106066	10.0537	0.1075	0.00353553	3.28887	0.1265	0.00353553	2.79489
2	0.132	0.0113137	8.57099	0.123	0.00424264	3.4493	0.113	0.00141421	1.25152	0.1295	0.00212132	1.63809	0.1245	0.0162635	13.063	0.108	0.00141421	1.30946	0.1285	0.00353553	2.75139	0.1225	0.00777817	6.34953	0.1375	0.00353553	2.5713
3	0.155	0.0268701	17.3355	0.144	0.00424264	2.94628	0.108	0.00282843	2.61891	0.1215	0.00494975	4.07387	0.128	0.00141421	1.10485	0.1105	0.00636396	5.75924	0.1535	0.00636396	4.1459	0.16	0	0	0.166	0.00282843	1.70387
4	0.2155	0.0148492	6.8906	0.1945	0.013435	6.90747	0.128	0.00282843	2.20971	0.119	0.00565685	4.75366	0.119	0.00282843	2.37683	0.1085	0.00353553	3.25856	0.2105	0.00353553	1.67959	0.224	0.00565685	2.52538	0.2335	0.00212132	0.908488
5	0.3085	0.00353553	1.14604	0.28	0.00707107	2.52538	0.1495	0.00212132	1.41894	0.1335	0.013435	10.0637	0.115	0.00141421	1.22975	0.098	0.00282843	2.88615	0.2825	0.00636396	2.25273	0.3225	0.0148492	4.60442	0.3305	0.00777817	2.35346
6	0.498	0.039598	7.9514	0.427	0.0325269	7.61754	0.1665	0.0106066	6.37033	0.1275	0.00353553	2.77297	0.112	0.00141421	1.26269	0.1035	0.00212132	2.04958	0.396	0.0254558	6.42824	0.482	0.0622254	12.9098	0.536	0.0169706	3.16615
7	0.746	0.0311127	4.1706	0.61	0.0537401	8.80985	0.1745	0.000707107	0.405219	0.13	0.00282843	2.17571	0.1205	0.0120208	9.97578	0.102	0.00141421	1.38648	0.49	0.0367696	7.50399	0.704	0.00565685	0.80353	0.766	0.00282843	0.369246
8	0.834	0.0424264	5.0871	0.807	0.0381838	4.73157	0.2105	0.0162635	7.72611	0.136	0.00565685	4.15945	0.116	0	0	0.1055	0.00212132	2.01073	0.738	0.0254558	3.4493	0.897	0.0127279	1.41894	0.972	0.0933381	9.60268
9	0.981	0.0296985	3.02737	0.921	0.0636396	6.90984	0.24	0.0240416	10.0173	0.137	0.00141421	1.03227	0.117	0.00424264	3.62619	0.1045	0.00212132	2.02997	0.849	0.0551543	6.49639	1.047	0.0212132	2.02609	1.128	0.00848528	0.752241
10	0.99	0.0339411	3.4284	0.9	0.0169706	1.88562	0.268	0.0311127	11.6092	0.138	0.00565685	4.09917	0.125	0.00848528	6.78823	0.103	0.00141421	1.37302	0.861	0.00424264	0.492757	1.029	0.0636396	6.18461	1.134	0.0339411	2.99304
11	1.005	0.046669	4.64369	0.909	0.0381838	4.20063	0.2965	0.033234	11.2088	0.134	0.00282843	2.11077	0.1135	0.00353553	3.11501	0.1055	0.000707107	0.670243	0.873	0.0381838	4.37386	1.032	0.00848528	0.822217	1.152	0.0169706	1.47314
		1,2,3-trichloropropane									epichlorohydrine								2-chloro-propane-1,3-diol				glycidol
